# Supplementary material
Source: PubMed Central journal article supplement (PMC5103002)
Supplement: mmc1.pdf [file mmc1.pdf]

**Biophysical Journal, Volume 111**

**Supplemental Information**

**Functional Analysis of Orai1 Concatemers Supports a Hexameric Stoichiometry for the CRAC Channel**

**Michelle Yen, Ludmila A. Lokteva, and Richard S. Lewis**

## SUPPORTING MATERIAL

### Functional analysis of Orai1 concatemers supports a hexameric stoichiometry for the CRAC channel

Michelle Yen, Ludmila A. Lokteva, and Richard S. Lewis

Department of Molecular and Cellular Physiology, Stanford University School of Medicine, Stanford, CA 94305

**Table S1: PCR primers used to generate Orai1 subunit inserts**

| Primer     | Purpose           | Sequence                                                    |
|------------|-------------------|-------------------------------------------------------------|
| 1          | SU1 for           | TCTAAGGCTCGAGGCCACCATGGAGCAAAGCTCATTTCTGAG<br>GA            |
|            | SU1 rev           | ACGGCAAGCTTGGCATAGTGGCTGCCGGGCGT                            |
| 2          | SU2 for           | TAATAAAGCTTGAAAACCTATACTTCCAAGGAGAGCAAAGC<br>TCATTTCTGAGGA  |
|            | SU2 rev           | ACGGCGAATTCGGCATAGTGGCTGCCGGGCGT                            |
| 3          | SU3 for           | AGGAAGAATTCGAGAACCTCTACTTCCAAGGAGAGCAAAGC<br>TCATTTCTGAGGA  |
|            | SU3 rev           | AGCAAGGTACCGGCATAGTGGCTGCCGGGCGT                            |
| 4          | SU4 for           | AGACACGGTACCGAAAACCTATACTTCCAAGGAGAGCAAAG<br>SU4 rev        |
|            | SU4 rev           | ACGGCGACTGCAGCATAGTGGCTGCCGGGCGTCAG                         |
| 5          | SU5 for           | AATAAACTGCAGAAAACCTATACTTCCAAGGAGAGCAAAGC<br>TCATTT         |
|            | SU5 rev           | TACGGCGATATCGGCATAGTGGCTGCCGGGCGTCAGGG                      |
| 6          | SU6 for           | TTACTAGATATCGAAAACCTATACTTCCAAGGAGAGCAAAG<br>SU6 rev        |
|            | SU6 rev           | ATGCGTGGATCCCATAGTGGCTGCCGGGCGT                             |
| 7<br>(SDM) | $\Delta$ Hind for | AGCCGCGCCAAGCTCAAAGCCTCCAGCCG                               |
|            | $\Delta$ Hind rev | CGGCTGGAGGCTTTGAGCTTGGCGCGGCT                               |
| 8<br>(SDM) | TRS for           | GGCCCGGGATCCACGAGAACCTTTATTTCCAGGGATCGGTCGC<br>CACCATGGTGAG |
|            | TRS rev           | ACCATGGTGGCGACCGATCCCTGGAAATAAAGGTTCTCGTGG<br>ATCCCGGGCCCGC |
| 9<br>(SDM) | L273D for         | ACCGACAGTTCAGGAGGACAACGAGCTGGCGGAG                          |
|            | L273D rev         | CTCCGCCAGCTCGTTGTCCTCCTGGAAGTGTCTCGT                        |

Primer sets were used for PCR amplification except where indicated. Primers used for site-directed mutagenesis are denoted by “SDM”

**Table S2: Linking sequences in the Orai1 concatemeric hexamer**

| Orai1 Subunit # | N-term appended sequence    | C-term appended sequence |
|-----------------|-----------------------------|--------------------------|
| 1               | XhoI-myc                    | HindIII                  |
| 2               | HindIII-linker <sup>a</sup> | EcoRI                    |
| 3               | EcoRI-linker <sup>a</sup>   | KpnI                     |
| 4               | KpnI-linker <sup>a</sup>    | PstI                     |
| 5               | PstI-linker <sup>a</sup>    | EcoRV                    |
| 6               | EcoRV-linker <sup>a</sup>   | BamHI                    |
| C-term eGFP     | BamHI-TRS                   |                          |

<sup>a</sup>linker = TRS (ENLYFQG) + myc (EQKLISEEDL) + Gly-Ser stretch (NGGGGS)

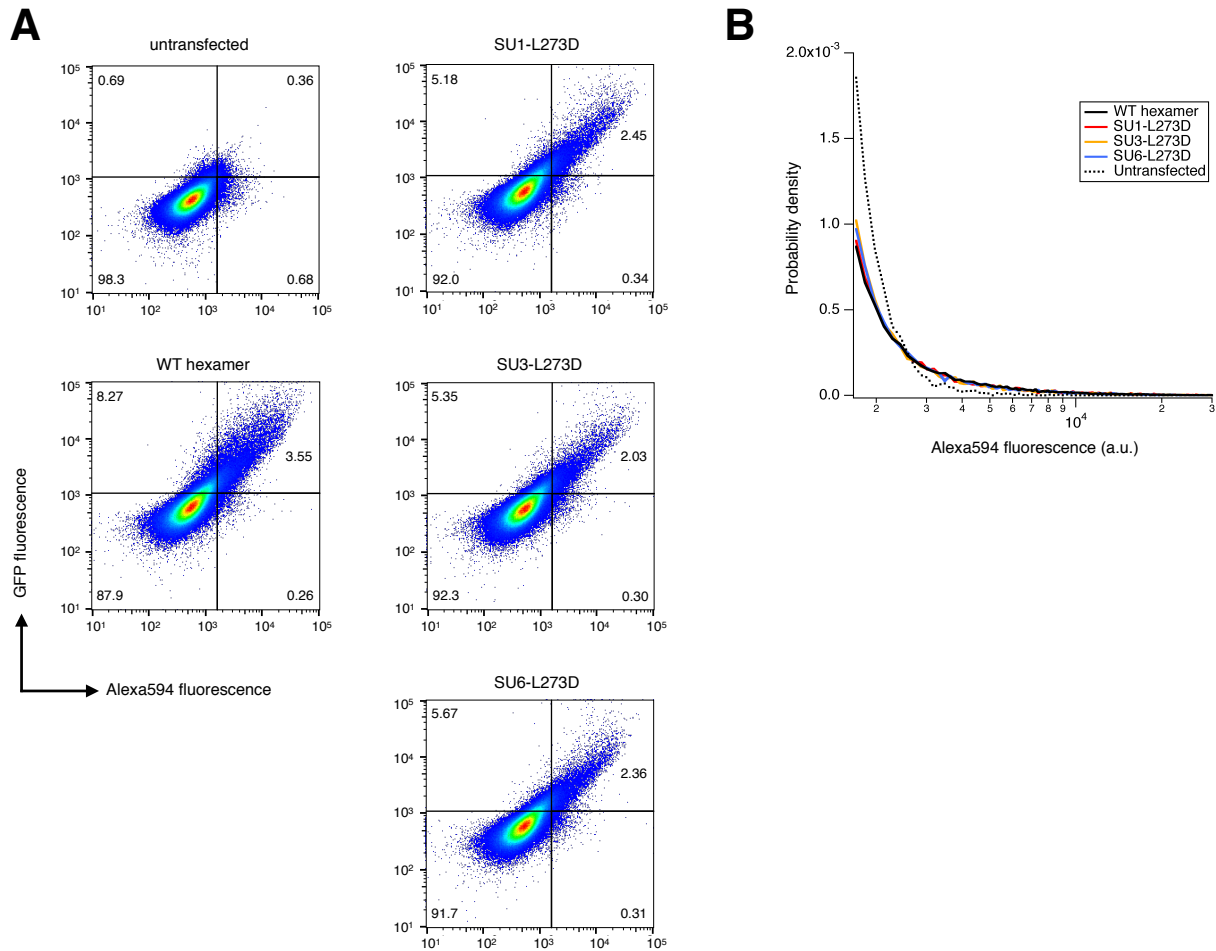

**Figure S1. Flow cytometry analysis of 6xOrai1 expression in the plasma membrane.** (A) Bivariate plot showing GFP (total Orai1) vs 2C1.1-Alexa594 (surface Orai1) fluorescence in untransfected HEK cells and HEK cells transfected with GFP-tagged 6xOrai1 variants. In cells transfected with 6xOrai1-GFP, GFP expression was proportional to Alexa594 fluorescence (upper right quadrants). Untransfected cells stained with 2C1.1 were used to establish a cutoff for GFP and Alexa594 negative and positive populations, as indicated by the quadrant gates. The gates were chosen separately such that 99% of untransfected cells fell in the negative population for GFP and for Alexa594. (B) Histogram of the GFP and Alexa594 double positive population in cells expressing Orai1 hexamer and untransfected cells. The Alexa594 fluorescence distribution is similar between WT and L273D hexamer populations. Each histogram contained > 1000 cells.
